# Supplementary material for: Initiating a high-temperature zinc ion battery through a triazolium-based ionic liquid
Source: Royal Society of Chemistry journal article supplement (doi:10.1039/d2ra00298a), 2022-01-01
Supplement: d2ra00298a1.pdf [file d2ra00298a1.pdf]

## Initiating a high temperature zinc ion battery through a triazolium-based ionic liquid

Xun Li,<sup>a</sup> Fawen Ning,<sup>b</sup> Lin Luo,<sup>b</sup> Jianhua Wu,<sup>\*a</sup> Yanhong Xiang,<sup>a</sup> Xianwen Wu,<sup>b</sup> Lizhi Xiong<sup>c</sup> and Xiaochun Peng<sup>\*b</sup>

<sup>a</sup>College of Physics and Electromechanical Engineering, Jishou University, Jishou, 416000, China.  
E-mail: jianhuawu@jsu.edu.cn.

<sup>b</sup>College of Chemistry and Chemical Engineering, Jishou University, Jishou, 416000, China. E-mail: pnfxz@jsu.edu.cn.

<sup>c</sup>College of Pharmacy, Jishou University, Jishou, 416000, China.

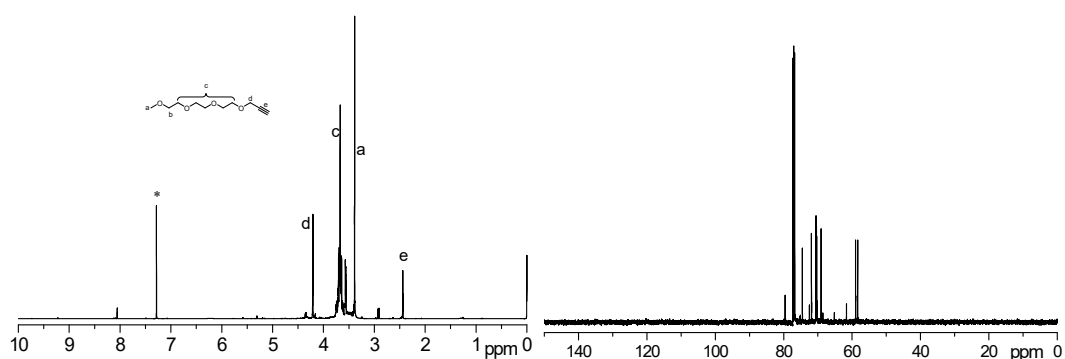

Fig. S1 <sup>1</sup>H NMR and <sup>13</sup>C NMR spectra of compound 1 (CDCl<sub>3</sub>)

NMR data for compound 1. <sup>1</sup>H NMR (500 MHz, CDCl<sub>3</sub>): δ 4.21 (2H, -CH<sub>2</sub>C≡CH), 3.75-3.59 (10H, -CH<sub>2</sub>O-), 3.56 (2H, -CH<sub>2</sub>OCH<sub>3</sub>), 3.39 (3H, -OCH<sub>3</sub>), 2.44 (1H, -C≡CH). <sup>13</sup>C NMR (125 MHz, CDCl<sub>3</sub>) δ 79.60, 74.55, 72.50, 71.88, 70.56, 70.45, 70.36, 69.06, 61.62, 58.98, 58.37.

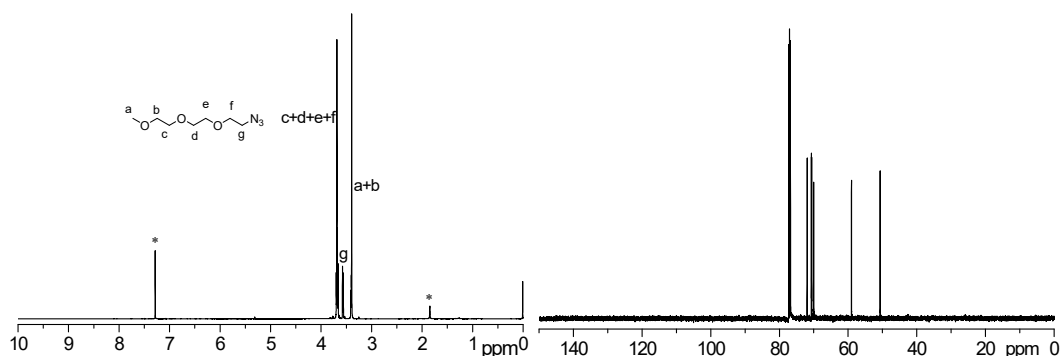

Fig. S2 <sup>1</sup>H NMR and <sup>13</sup>C NMR spectra of compound 2 (CDCl<sub>3</sub>)

NMR data for compound 2. <sup>1</sup>H NMR (500 MHz, CDCl<sub>3</sub>): δ 3.69 (10H, -CH<sub>2</sub>O-), 3.57 (2H, -CH<sub>2</sub>N<sub>3</sub>), 3.39 (3H, -CH<sub>2</sub>OCH<sub>3</sub>). <sup>13</sup>C NMR (125 MHz, CDCl<sub>3</sub>) δ 71.93, 70.70, 70.66, 70.60, 70.02, 59.02, 50.68.

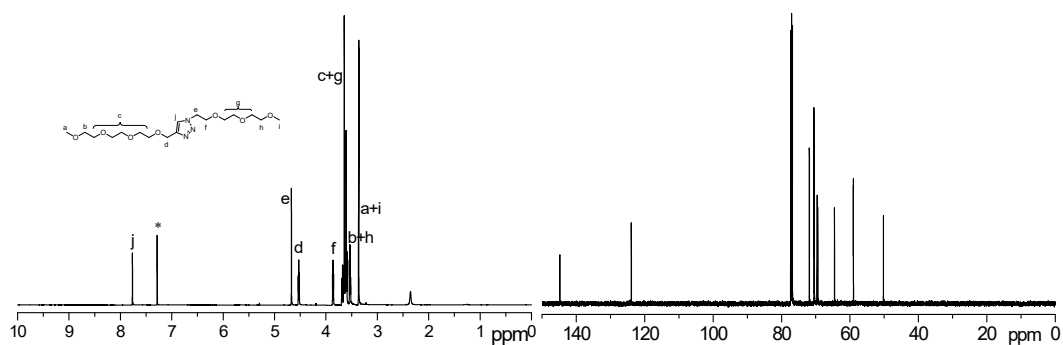

**Fig. S3**  $^1\text{H}$  NMR and  $^{13}\text{C}$  NMR spectra of compound **3** ( $\text{CDCl}_3$ )

NMR data for compound **3**.  $^1\text{H}$  NMR (500 MHz,  $\text{CDCl}_3$ ):  $\delta$  7.77 (1H, triazole-*H*), 4.67 (2H, -N=N-N- $\text{CH}_2\text{CH}_2\text{O}$ -), 4.53 (2H, -N=N-C $\text{CH}_2\text{O}$ -), 3.86 (2H, -N=N-N $\text{CH}_2\text{CH}_2\text{O}$ -), 3.70-3.53 (20H, - $\text{CH}_2\text{O}$ -), 3.36 (6H, -O- $\text{CH}_3$ ).  $^{13}\text{C}$  NMR (125 MHz,  $\text{CDCl}_3$ )  $\delta$  144.81, 123.89, 71.87, 70.52, 70.44, 69.60, 69.42, 64.51, 58.98, 50.22.

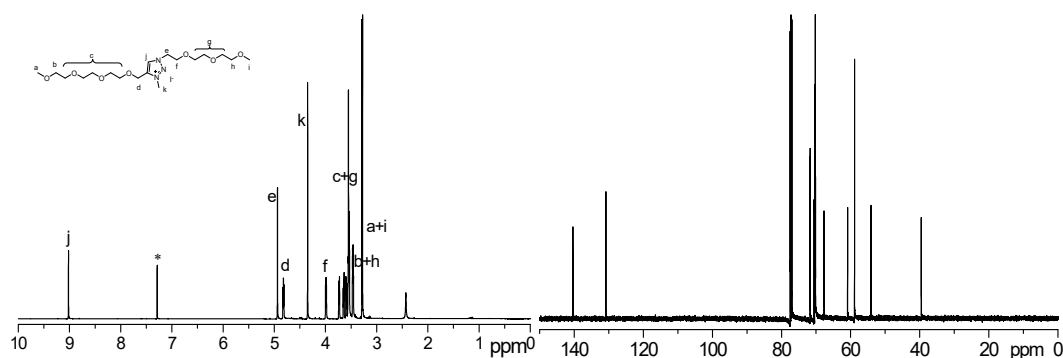

**Fig. S4**  $^1\text{H}$  NMR and  $^{13}\text{C}$  NMR spectra of compound **4** ( $\text{CDCl}_3$ )

NMR data for compound **4**.  $^1\text{H}$  NMR (500 MHz,  $\text{CDCl}_3$ ):  $\delta$  9.02 (1H, triazole-*H*), 4.94 (2H, -N=N-N- $\text{CH}_2\text{CH}_2\text{O}$ -), 4.81 (2H, -N=N-C $\text{CH}_2\text{O}$ -), 4.35 (3H, triazole- $\text{CH}_3$ ), 3.98 (2H, -N=N-N $\text{CH}_2\text{CH}_2\text{O}$ -), 3.73-3.46 (20H, - $\text{CH}_2\text{O}$ -), 3.28 (6H, -O- $\text{CH}_3$ ).  $^{13}\text{C}$  NMR (125 MHz,  $\text{CDCl}_3$ )  $\delta$  140.35, 130.84, 71.77, 71.73, 70.58, 70.38, 70.34, 70.27, 70.21, 70.16, 67.70, 60.89, 58.88, 54.12, 39.55.

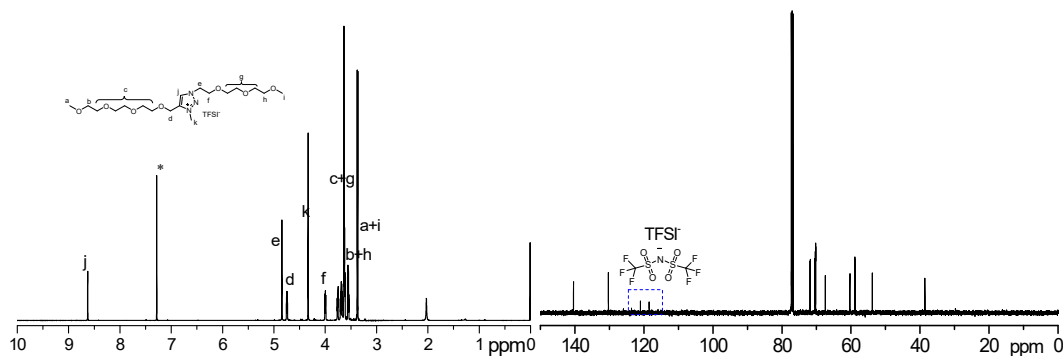

**Fig. S5**  $^1\text{H}$  NMR and  $^{13}\text{C}$  NMR spectra of compound **T1** ( $\text{CDCl}_3$ )

NMR data for compound **T1**.  $^1\text{H}$  NMR (500 MHz,  $\text{CDCl}_3$ ):  $\delta$  8.63 (1H, triazole-*H*), 4.84 (2H, -N=N-N- $\text{CH}_2\text{CH}_2\text{O}$ -), 4.75 (2H, -N=N-C $\text{CH}_2\text{O}$ -), 4.33 (3H, triazole- $\text{CH}_3$ ), 4.00 (2H, -N=N-N $\text{CH}_2\text{CH}_2\text{O}$ -), 3.75-3.55 (20H, - $\text{CH}_2\text{O}$ -), 3.38 (6H, -O- $\text{CH}_3$ ).  $^{13}\text{C}$  NMR (125 MHz,  $\text{CDCl}_3$ )  $\delta$  140.41, 130.29, 123.59, 121.03, 118.48, 115.92, 71.84, 71.77, 70.51, 70.45, 70.41, 70.36, 70.34, 70.23, 70.21, 67.45, 60.31, 58.87, 58.82, 53.83, 38.57.

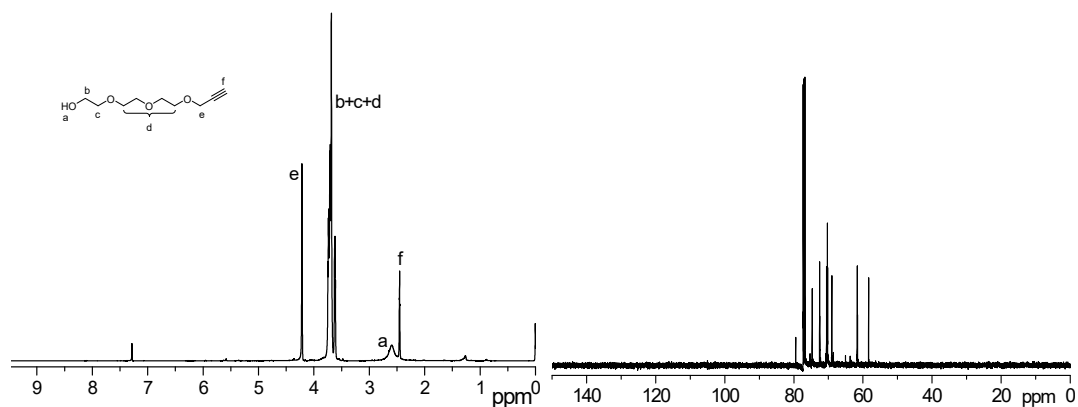

**Fig. S6**  $^1\text{H}$  NMR and  $^{13}\text{C}$  NMR spectra of compound **5** ( $\text{CDCl}_3$ )

NMR data for compound **5**.  $^1\text{H}$  NMR (500 MHz,  $\text{CDCl}_3$ ):  $\delta$  4.21 (2H, - $\text{CH}_2\text{-CCH}$ ), 3.81-3.57 (12H, -O- $\text{CH}_2\text{-O}$ -), 2.60 (1H, -OH), 2.46 (1H, -CCH).  $^{13}\text{C}$  NMR (125 MHz,  $\text{CDCl}_3$ )  $\delta$  79.48, 74.70, 72.58, 72.53, 70.57, 70.29, 69.03, 61.65, 58.37.

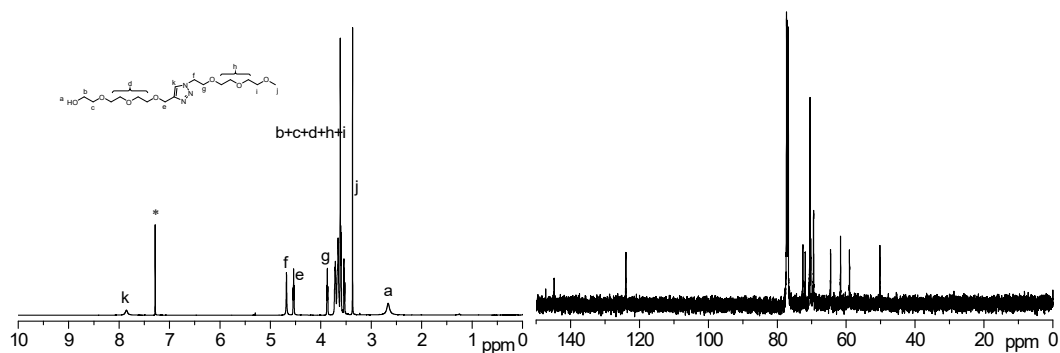

**Fig. S7**  $^1\text{H}$  NMR and  $^{13}\text{C}$  NMR spectra of compound **6** ( $\text{CDCl}_3$ )

NMR data for compound **6**.  $^1\text{H}$  NMR (500 MHz,  $\text{CDCl}_3$ ):  $\delta$  7.85 (1H, triazole-*H*), 4.68 (2H, -N=N-N- $\text{CH}_2\text{CH}_2\text{O}$ -), 4.54 (2H, -N=N-C $\text{CH}_2\text{O}$ -), 3.87 (2H, -N=N-N $\text{CH}_2\text{CH}_2\text{O}$ -), 3.71-3.54 (20H, - $\text{CH}_2\text{O}$ -), 3.37 (3H, -O $\text{CH}_3$ ), 2.66 (-OH).  $^{13}\text{C}$  NMR (125 MHz,  $\text{CDCl}_3$ )  $\delta$  144.67, 123.95, 72.57, 71.87, 70.50, 70.28, 69.45, 64.52, 61.64, 59.04, 50.21.

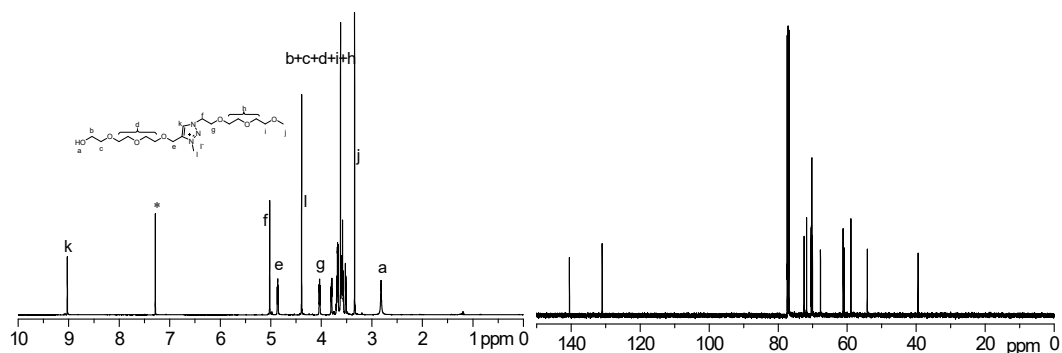

**Fig. S8**  $^1\text{H}$  NMR and  $^{13}\text{C}$  NMR spectra of compound **7** ( $\text{CDCl}_3$ )

NMR data for compound **7**.  $^1\text{H}$  NMR (500 MHz,  $\text{CDCl}_3$ ):  $\delta$  9.03 (1H, triazole-*H*), 5.02 (2H, -N=N-N- $\text{CH}_2\text{CH}_2\text{O}$ -), 4.85 (2H, -N=N-C $\text{CH}_2\text{O}$ -), 4.38 (3H, triazole- $\text{CH}_3$ ), 4.02 (2H, -N=N-N $\text{CH}_2\text{CH}_2\text{O}$ -), 3.79-3.52 (20H, - $\text{CH}_2\text{O}$ -), 3.34 (3H, - $\text{OCH}_3$ ), 2.82 (-OH).  $^{13}\text{C}$  NMR (125 MHz,  $\text{CDCl}_3$ )  $\delta$  140.49, 131.00, 72.50, 71.78, 70.47, 70.41, 70.38, 70.33, 70.26, 70.07, 67.74, 61.17, 60.91, 58.94, 54.17, 39.46.

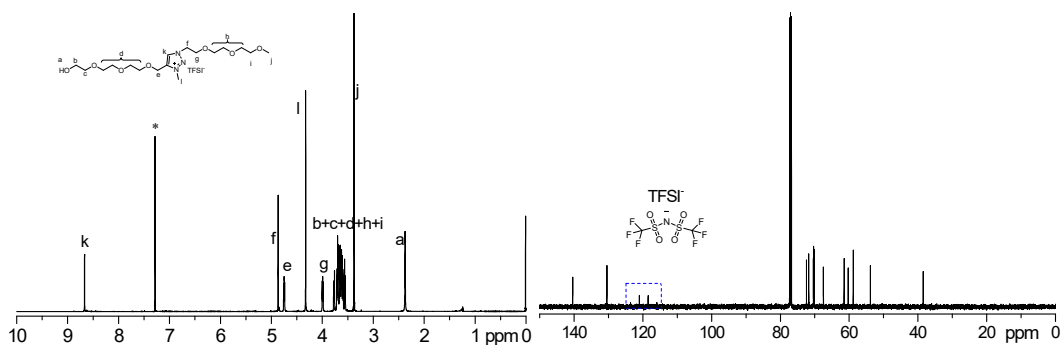

**Fig. S9**  $^1\text{H}$  NMR and  $^{13}\text{C}$  NMR spectra of compound **T2** ( $\text{CDCl}_3$ )

NMR data for compound **T2**.  $^1\text{H}$  NMR (500 MHz,  $\text{CDCl}_3$ ):  $\delta$  8.67 (1H, triazole-*H*), 4.87 (2H, -N=N-N- $\text{CH}_2\text{CH}_2\text{O}$ -), 4.75 (2H, -N=N-C $\text{CH}_2\text{O}$ -), 4.33 (3H, triazole- $\text{CH}_3$ ), 3.99 (2H, -N=N-N $\text{CH}_2\text{CH}_2\text{O}$ -), 3.77-3.55 (20H, - $\text{CH}_2\text{O}$ -), 3.38 (3H, - $\text{OCH}_3$ ), 2.38 (-OH).  $^{13}\text{C}$  NMR (125 MHz,  $\text{CDCl}_3$ )  $\delta$  140.41, 130.46, 123.57, 121.02, 118.47, 115.80, 72.42, 71.75, 70.41, 70.35, 70.32, 70.31, 70.20, 70.18, 70.10, 67.49, 61.47, 60.29, 58.82, 53.83, 38.47.

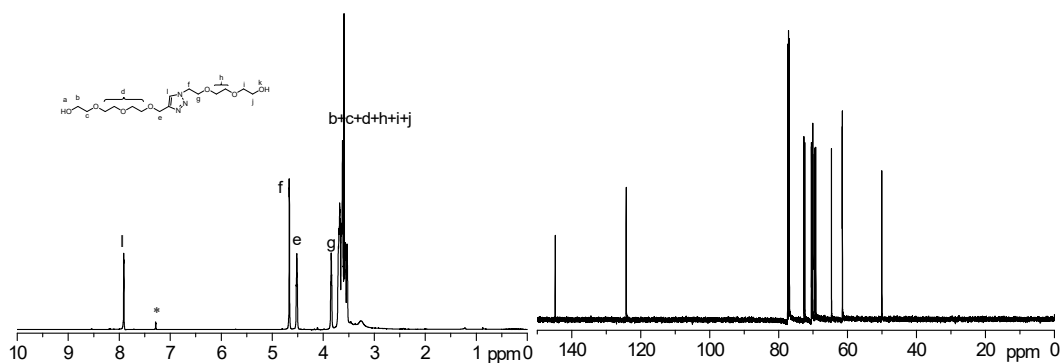

**Fig. S10**  $^1\text{H}$  NMR and  $^{13}\text{C}$  NMR spectra of compound **9** ( $\text{CDCl}_3$ )

NMR data for compound **9**.  $^1\text{H}$  NMR (500 MHz,  $\text{CDCl}_3$ ):  $\delta$  7.91 (1H, triazole-*H*), 4.67 (2H, -N=N-N- $\text{CH}_2\text{CH}_2\text{O}$ -), 4.52 (2H, -N=N-C $\text{CH}_2\text{O}$ -), 3.84 (2H, -N=N-N $\text{CH}_2\text{CH}_2\text{O}$ -), 3.70-3.53 (20H, - $\text{CH}_2\text{O}$ -).  $^{13}\text{C}$  NMR (125 MHz,  $\text{CDCl}_3$ )  $\delta$  144.80, 124.21, 72.64, 72.43, 70.50, 70.45, 70.37, 70.14, 70.10, 69.46, 69.24, 64.67, 61.52, 61.49, 50.08.

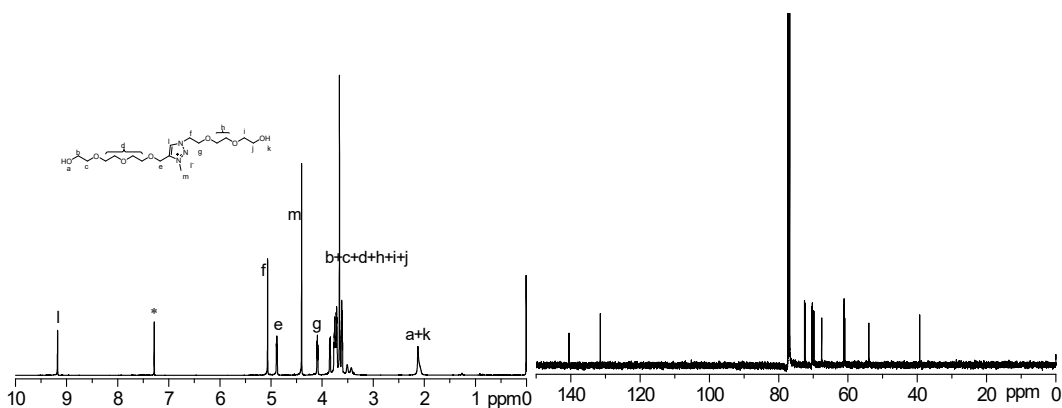

**Fig. S11**  $^1\text{H}$  NMR and  $^{13}\text{C}$  NMR spectra of compound **10** ( $\text{CDCl}_3$ )

NMR data for compound **10**.  $^1\text{H}$  NMR (500 MHz,  $\text{CDCl}_3$ ):  $\delta$  9.18 (1H, triazole-*H*), 5.07 (2H, -N=N-N- $\text{CH}_2\text{CH}_2\text{O}$ -), 4.88 (2H, -N=N-C $\text{CH}_2\text{O}$ -), 4.40 (3H, triazole- $\text{CH}_3$ ), 4.10 (2H, -N=N-N $\text{CH}_2\text{CH}_2\text{O}$ -), 3.85-3.43 (20H, - $\text{CH}_2\text{O}$ -), 2.13 (-OH).  $^{13}\text{C}$  NMR (125 MHz,  $\text{CDCl}_3$ )  $\delta$  140.51, 131.47, 72.54, 72.45, 70.43, 70.35, 70.29, 70.27, 70.03, 69.85, 67.60, 61.24, 61.15, 60.94, 53.99, 39.31.

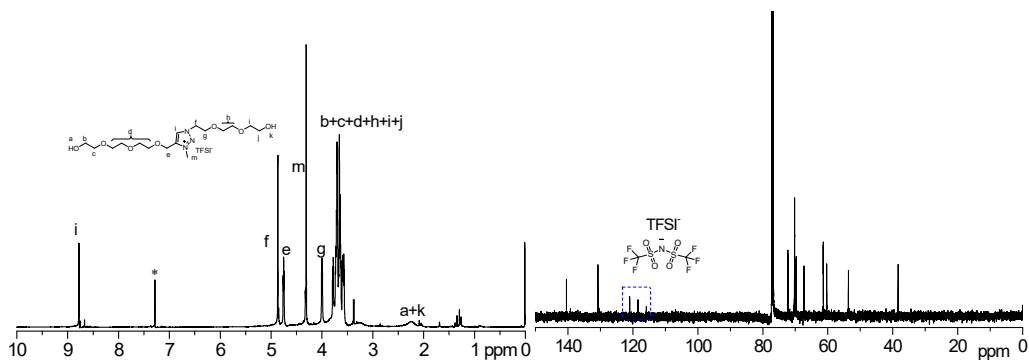

**Fig. S12**  $^1\text{H}$  NMR and  $^{13}\text{C}$  NMR spectra of compound **T3** ( $\text{CDCl}_3$ )

NMR data for compound **T3**.  $^1\text{H}$  NMR (500 MHz,  $\text{CDCl}_3$ ):  $\delta$  8.78 (1H, triazole-*H*), 4.87 (2H,  $-\text{N}=\text{N}-\text{N}-\text{CH}_2\text{CH}_2\text{O}-$ ), 4.74 (2H,  $-\text{N}=\text{N}-\text{CCH}_2\text{O}-$ ), 4.31 (3H, triazole- $\text{CH}_3$ ), 3.99-3.57 (20H,  $-\text{CH}_2\text{O}-$ ), 2.23 ( $-\text{OH}$ ).  $^{13}\text{C}$  NMR (125 MHz,  $\text{CDCl}_3$ )  $\delta$  140.46, 130.74, 123.32, 120.99, 118.40, 115.80, 72.37, 72.26, 70.23, 70.14, 69.90, 69.73, 67.31, 61.39, 61.37, 60.33, 53.66, 38.37.

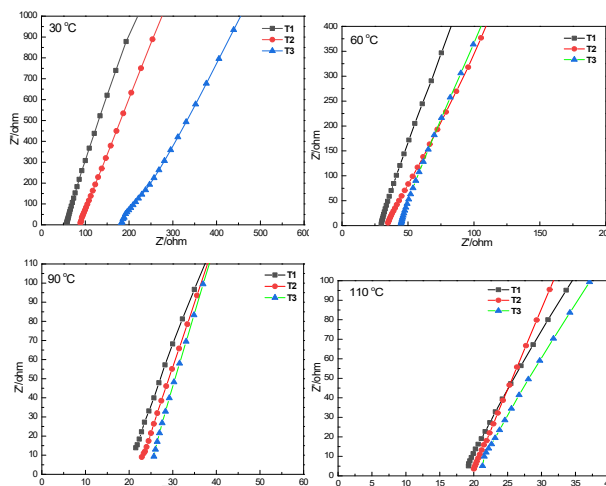

**Fig. S13** Nyquist plots of **T1**, **T2** and **T3** versus temperature, measured by EIS from 30 to 110 °C.

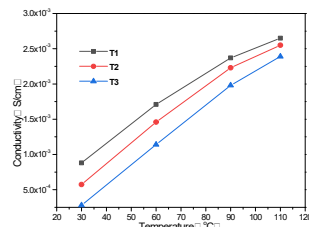

**Fig. S14** Intrinsic ionic conductivity of **T1**, **T2** and **T3** versus temperature, measured by EIS from 30 to 110 °C.

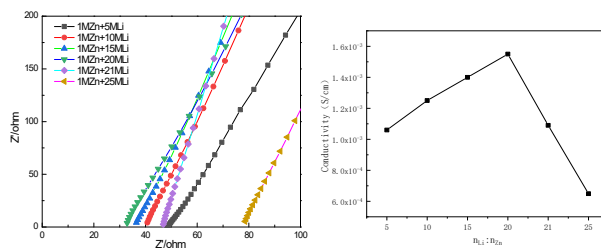

**Fig. S15** Nyquist and conductivity diagram of **T1S-x** with salt proportion, measured by EIS at 30 °C.

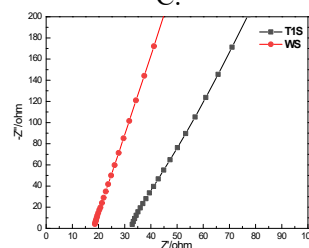

**Fig. S16** Nyquist diagram of **T1S-20** and **WS-20** at 30 °C.
